# Two Methyl Jasmonate-Insensitive Mutants Show Altered Expression of *AtVsp* in Response to Methyl Jasmonate and Wounding<sup>1</sup>

Susanne Berger<sup>2,3</sup>, Erin Bell, and John E. Mullet\*

Department of Biochemistry and Biophysics, Texas A&M University, College Station, Texas 77843–2128

Jasmonates are plant signal molecules that are derived from lipids through the action of lipoxygenase. Jasmonates regulate gene expression during plant development and in response to water deficit, wounding, and pathogen elicitors. The signal transduction chain that mediates jasmonate action was investigated by isolating and studying two methyl jasmonate (MeJA)-insensitive mutants of *Arabidopsis thaliana*. The recessive mutants, *jin1* and *jin4*, are nonallelic and neither corresponds to *coi1*, a previously identified MeJA-insensitive mutant. Both mutants showed reduced sensitivity to MeJA-mediated root growth inhibition as well as reduced MeJA induction of *AtVsp* in leaves. Expression of *AtVsp* in flowers was not altered in the mutants. Furthermore, MeJA modulation of the jasmonate-responsive lipoxygenase and phenylalanine ammonia lyase genes was not altered in the mutants. *jin4* plants exhibited increased sensitivity to abscisic acid in seed germination assays, whereas *jin1* plants showed wild-type sensitivity. Neither mutant showed altered sensitivity to ethylene in hypocotyl growth inhibition assays. *jin1* and *jin4* identify genes that modulate the response of *AtVsp* to MeJA in leaves of *A. thaliana*.

Jasmonic acid and its derivatives, collectively referred to as jasmonates, are naturally occurring derivatives of plant lipids. These substances are synthesized from linolenic acid in a lipoxygenase-dependent biosynthetic pathway (Vick and Zimmerman, 1984). The distribution of endogenous jasmonates in plants and the actions of exogenously applied jasmonates show that these compounds regulate gene expression during plant development and in response to stress (for review, see Creelman and Mullet, 1995).

Jasmonates inhibit seed germination and growth of seedlings and roots (Yamane et al., 1981). Furthermore, tuberonic acid, a derivative of jasmonic acid, has been suggested to regulate tuber formation in potato (Koda, 1992). Jasmonates also stimulate tendrils coiling in *Bryonia dioica*, a reaction that is also induced in response to touch stimulus

(Falkenstein et al., 1991). Jasmonate concentrations greater than 45  $\mu\text{M}$  induce senescence (Weidhase et al., 1987). In excised barley leaves, the MeJA-induced senescence response includes degradation of chlorophyll, inhibition of synthesis of photosynthesis-related proteins such as the small and large subunits of Rubisco and proteins of the light-harvesting complex, and induction of new protein synthesis (Herrmann et al., 1989; Reinbothe et al., 1993). However, the *in vivo* role of jasmonates in senescence is not clear because endogenous jasmonate levels are high in young, developing tissues. In soybean, the highest levels of jasmonates are found in fruits, flowers, and young leaves (Creelman and Mullet, 1995).

Jasmonate levels vary during development, in different tissues, and in response to environmental factors. Jasmonate can accumulate in plants in response to water deficit and wounding (Creelman et al., 1992; Creelman and Mullet, 1995). In plant cell cultures, jasmonate levels increase after elicitor treatment (Gundlach et al., 1992). Applied jasmonates induce a variety of genes that are also activated by wounding, drought, and pathogens. Several of the jasmonate-inducible genes encode proteins involved in plant defense (Farmer and Ryan, 1992; Reinbothe et al., 1994). Examples of jasmonate- and wound-inducible genes include those encoding chalcone synthase (Creelman et al., 1992), Phe ammonia lyase (Gundlach et al., 1992), RIP60 (Chaudhry et al., 1994), and certain proteinase inhibitors (Farmer et al., 1992). The soybean VSPs are induced by jasmonate as well as by fruit removal, wounding, and water deficit (Wittenbach, 1982, 1983; Mason and Mullet, 1990). One of the VSPs is a lipoxygenase, an enzyme involved in jasmonate biosynthesis (Tranbarger et al., 1991). The VSPs also include the acid phosphatases, VSP $\alpha$  and VSP $\beta$  (DeWald et al., 1992).

The signal transduction pathway that modulates jasmonate accumulation and MeJA-responsive genes requires further clarification. Promoter regions that confer jasmonate inducibility have been identified for the potato *PinII* and soybean *VspB* genes. Both of these jasmonate-responsive DNA domains contain a G box (Kim et al., 1992; Mason et al., 1993). A similar DNA element has been found in *VspA* and *Chs*, two other jasmonate-inducible genes (Schulze-Lefert et al., 1989; Mason et al., 1993).

Abbreviations: MeJA, methyl jasmonate; MS, Murashige-Skoog; VSP, vegetative storage protein.

<sup>1</sup> This research was supported in part by the Texas Agricultural Experiment Station and grant no. 37100–9014 from the U.S. Department of Agriculture-National Research Initiative Competitive Grants Program.

<sup>2</sup> S.B. was supported by a fellowship from the Deutsche Forschungsgemeinschaft.

<sup>3</sup> Present address: Institut für Pflanzenbiochemie, Weinberg 3, 06120 Halle/Saale, Germany.

\* Corresponding author; e-mail mullet@kinvax.tamu.edu; fax 1–409–862–4718.

Analysis of plant mutants is a useful approach for studying hormone action and signal transduction (Klee and Estelle, 1991). The first identified jasmonate-insensitive mutant, *jar1*, was isolated by screening plants for jasmonate-insensitive root growth (Staswick et al., 1992). This mutant also showed reduced accumulation of a 29-kD MeJA-inducible protein that is immunologically related to the soybean VSP $\alpha$ /VSP $\beta$  (Staswick et al., 1992). A second jasmonate-insensitive mutant, *coi1*, was isolated because the plants were resistant to coronatine, a chlorosis-inducing toxin (Feys et al., 1994). This mutant also lacked the ability to induce proteins of 29 and 31 kD when treated with MeJA. The 29- and 31-kD proteins were subsequently identified as VSPs immunologically related to the soybean VSP $\alpha$  and VSP $\beta$  (Benedetti and Turner, 1995; Berger et al., 1995). To further dissect the signal transduction pathway that mediates jasmonate action, we have isolated and characterized two additional MeJA-insensitive mutants of *Arabidopsis thaliana*, *jin1* and *jin4*.

## MATERIALS AND METHODS

### Plant Material and Treatments

*Arabidopsis thaliana* ecotype Columbia seeds were treated with 50 krad of  $\gamma$ -irradiation. Self-fertilization produced M<sub>2</sub> seeds that were used for screening. In addition, the T-DNA insertion collection (stock no. 3115, T<sub>4</sub> progeny) from the Arabidopsis Biological Resource Center at Ohio State University (Columbus) was screened. For screening, sterilized seeds were sown on square agar plates of MS medium (Murashige and Skoog, 1962) supplemented with 1% Suc, 0.5 g/L Mes, and 0.8% agar containing 75  $\mu$ M MeJA, incubated at 4°C for 2 d, and placed vertically in a growth chamber at 21°C in continuous light. Selected seedlings were grown to maturity in soil and allowed to self-fertilize, and seeds of the next generation were rescreened for root growth on 10 and 100  $\mu$ M MeJA and on MS medium in comparison to the wild type. M<sub>4</sub> *jin1* plants and T<sub>6</sub> *jin4* plants were used for crosses with wild type and with the mutants *coi1* and *jar1*. Characterization of genetic crosses was performed on medium containing 10  $\mu$ M MeJA as described above.

For subsequent analyses M<sub>4</sub> *jin1* seeds and T<sub>6</sub> *jin4* seeds were used, and experiments were repeated with seeds from the next selfed generation. To examine the effect of ethylene, sterilized seeds were sown on MS medium and stored at 4°C for 4 d in the dark. The plates were then placed vertically in a 20-L sealed glass container in the dark at 22°C, and 20  $\mu$ L of ethylene were added. For characterization of ABA sensitivity, sterilized seeds were planted on medium containing 5  $\mu$ M ABA, incubated at 4°C for 2 d, and placed horizontally at 21°C in continuous light. Plants used to test the influence of MeJA on gene expression were grown in 20 mL of liquid MS medium in a GA7 vessel (Magenta, Chicago, IL) at 21°C in continuous light. After 15 d, MeJA was added to the liquid to a final concentration of 60  $\mu$ M (stock solution 1000 $\times$  in ethanol). Leaves and roots were harvested between 8 and 48 h after MeJA addition. For wounding experiments, plants were grown for 4 weeks

in soil at 21°C with a 12.5-h/11.5-h light/dark period. The upper halves of rosette leaves were wounded with a hemostat, and wounded leaves were harvested 8 h after wounding.

### RNA Analysis

Tissue was frozen in liquid nitrogen immediately after harvest and stored at -80°C. Nucleic acid was isolated and analyzed as described previously (Berger et al., 1995). Detection of *AtVsp*, *Lox1*, and *Lox2* mRNA was performed as described previously (Bell and Mullet, 1993; Berger et al., 1995). For detection of *Pal1* mRNA, the gene-specific insert from the clone *Pal 1-6* (Wanner et al., 1995) was used as a probe.

### Protein Analysis

Proteins were isolated as described previously (Berger et al., 1995), separated on 15% SDS-polyacrylamide gels, and electroblotted onto an Immobilon P membrane (Millipore). Detection of antigen-antibody complexes was performed using the ECL system (Amersham) according to the manufacturer's protocol.

## RESULTS

### Isolation of Mutants and Genetic Analysis

A population of 40,000 Arabidopsis M<sub>2</sub> seeds (ecotype Columbia) mutagenized by  $\gamma$ -irradiation, as well as the mutant collection generated by K. Feldman (University of Arizona, Tucson) by *Agrobacterium*-mediated T-DNA insertion into Arabidopsis (ecotype WS), were screened for MeJA-insensitive root growth. Seeds were germinated on 75  $\mu$ M MeJA, and after 10 to 14 d, plants with longer roots were selected. Two mutants, *jin1* and *jin4*, were further characterized. *jin1* was derived from the  $\gamma$ -irradiation-treated population, and *jin4* was obtained from the T-DNA insertion collection.

The effect of different MeJA concentrations on root growth in the wild types and the mutants was determined. Root growth of wild-type plants was inhibited 83 and 92% by 10 and 100  $\mu$ M MeJA, respectively (Table I). Root growth of the mutants was also inhibited by MeJA but to a smaller extent. *jin1* had roots 2 times longer than wild-type plants at 10 and 100  $\mu$ M MeJA. *jin4* roots were 2.5 times longer than wild-type roots at 10  $\mu$ M MeJA and slightly longer

**Table I.** Inhibition of root growth by MeJA

Root length of wild-type and *jin1* and *jin4* seedlings on medium containing the MeJA concentration indicated. Seedling age was 8 d. Results are means  $\pm$  SD of at least 23 seedlings. WtC, Wild-type Columbia; WtWS, wild-type WS.

| MeJA<br>$\mu$ M | Root Length    |                |                |                |
|-----------------|----------------|----------------|----------------|----------------|
|                 | WtC            | <i>jin1</i>    | WtWS           | <i>jin4</i>    |
| 0               | 45.9 $\pm$ 5.4 | 39.0 $\pm$ 8.4 | 44.4 $\pm$ 6.2 | 46.0 $\pm$ 3.7 |
| 10              | 8.0 $\pm$ 3.0  | 16.4 $\pm$ 5.6 | 9.7 $\pm$ 2.5  | 24.9 $\pm$ 5.1 |
| 100             | 3.8 $\pm$ 1.3  | 8.1 $\pm$ 2.3  | 5.2 $\pm$ 1.8  | 8.7 $\pm$ 2.6  |

than wild-type roots at 100  $\mu\text{M}$  MeJA (Table I). In the absence of MeJA, the growth of each mutant was similar to the growth of the corresponding wild-type plant.

To determine whether the mutant phenotypes were inherited as recessive or dominant traits, *jin1* and *jin4* were crossed to the wild-type ecotypes Columbia and WS, respectively. The  $F_2$  populations produced by self-fertilization of  $F_1$  plants were scored for root growth on 10  $\mu\text{M}$  MeJA. This concentration was chosen because the difference between wild-type and mutant phenotypes was maximal at this concentration (Table I). For each mutant the segregation ratio of the wild-type phenotype to the mutant phenotype was close to 3:1 (Table II), the expected ratio if the mutant phenotypes were inherited as single, recessive Mendelian markers.

To find out whether the two mutants are allelic, *jin1* and *jin4* were crossed and plants of the  $F_2$  population were monitored for root growth on 10  $\mu\text{M}$  MeJA. If the mutants are nonallelic, a ratio of 9:7 of wild-type to mutant phenotype is expected. Table II shows that the observed ratio is in agreement with *jin1* and *jin4* being nonallelic. Two other mutants with MeJA-insensitive root growth, *jar1* and *coi1*, have been described previously (Staswick et al., 1992; Feys et al., 1994). To determine whether *jin1* or *jin4* is allelic to either of these mutants, genetic crosses were done and  $F_2$  plants from each cross were monitored for root growth on 10  $\mu\text{M}$  MeJA. Of 131 plants from the  $F_2$  population of the cross between *coi1* and *jin1*, 78 showed a jasmonate-sensitive root growth phenotype (Table II). This result indicates that *coi1* and *jin1* are nonallelic. Similarly, 90 of 139  $F_2$  plants from the cross between *jar1* and *jin1* had a wild-type root growth phenotype in the presence of MeJA (Table II). This ratio of wild-type to mutant phenotype is somewhat higher than expected but is consistent with the conclusion that these mutants are nonallelic ( $\chi^2 = 4.2$ ,  $P > 0.01$ ). The higher than expected proportion of wild-type plants is probably related to our difficulty of scoring the *jar1* phenotype. Under our conditions, 42% of the homozygous *jar1* parental plants showed wild-type root lengths in the presence of MeJA.

Analysis of  $F_2$  plants from the cross *coi1* and *jin4* revealed 44 of 117  $F_2$  plants (38%) with wild-type sensitivity to MeJA (Table II). This is less than the 56% wild-type plants expected for nonallelic mutations. To further examine the relationship between these mutants,  $F_1$  plants from a cross of *coi1* and *jin4* were analyzed. In this case, all of the plants were sensitive to MeJA, indicating that *coi1* and *jin4* are nonallelic.

The most difficult cross to analyze was between *jin4* and *jar1*. This is most likely due to the weak phenotype of both mutants. Analysis of  $F_2$  plants from this cross showed that 25% of the plants had a wild-type phenotype (Table II). If these genes were allelic, then no wild-type  $F_2$  plants would be observed (assuming accurate scoring). Further information was obtained by examining root growth of  $F_1$  plants from this cross (Table II). For nonallelic mutations, we would expect all of the  $F_1$  plants to have the wild-type phenotype (Table II). However, 30% of the  $F_1$  plants showed a MeJA-insensitive root growth phenotype (Table II). We believe that this ambiguity is due at least in part to the difficulty we encountered in correctly scoring *jar1* homozygotes as mutant, but it is not clear that this entirely accounts for the segregation anomalies seen in the *jar1*  $\times$  *jin4* cross. More complex speculations are possible, but mapping of the *jin4* and *jar1* mutations will eventually resolve the question of allelism.

### Sensitivity to ABA and Ethylene

Ethylene, ABA, and MeJA can inhibit plant growth. Ethylene and jasmonates promote fruit ripening and senescence. Several plant genes involved in protection from pathogens or insects respond synergistically to jasmonate and ethylene (Xu et al., 1994). ABA and jasmonate levels increase in response to water deficit and some jasmonate-inducible genes are also responsive to ABA. So far, it is unknown whether jasmonate and other plant hormones share common signal transduction pathways. Therefore we investigated whether the mutants *jin1* and *jin4* have an altered response to ethylene or ABA.

**Table II.** Genetic analyses of *jin1*, *jin4*, *coi1*, and *jar1* jasmonate-insensitive mutants

Crosses were performed using the wild type or the first mutant written as the female parent. Plants were grown on 10  $\mu\text{M}$  MeJA for 8 d (10 d for  $F_1$  plants) and scored as sensitive or insensitive to MeJA based on root length in comparison to root length of seedlings of the homozygous parents. The expected number of each type in each cross is based on the assumption that all the mutations are recessive and nonallelic. WtC, Wild-type Columbia; WtWS, wild-type WS; —, cannot be calculated.

| Cross                                         | Type  | Total | Sensitive |          | Insensitive |          | $\chi^2$ |
|-----------------------------------------------|-------|-------|-----------|----------|-------------|----------|----------|
|                                               |       |       | Observed  | Expected | Observed    | Expected |          |
| WtC $\times$ <i>jin1</i>                      | $F_2$ | 98    | 71        | 74       | 27          | 24       | 0.34     |
| WtWS $\times$ <i>jin4</i>                     | $F_2$ | 172   | 134       | 129      | 38          | 43       | 0.78     |
| <i>jin1</i> $\times$ <i>jin4</i>              | $F_2$ | 128   | 74        | 72       | 54          | 56       | 0.13     |
| <i>coi1</i> $\times$ <i>jin1</i>              | $F_2$ | 131   | 78        | 74       | 53          | 57       | 0.77     |
| <i>jar1</i> $\times$ <i>jin1</i>              | $F_2$ | 139   | 90        | 78       | 49          | 61       | 4.21     |
| <i>coi1</i> $\times$ <i>jin4</i>              | $F_1$ | 57    | 57        | 57       | 0           | 0        | —        |
| <i>coi1</i> $\times$ <i>jin4</i>              | $F_2$ | 117   | 44        | 66       | 73          | 51       | 16.03    |
| <i>jar1</i> $\times$ <i>jin4</i>              | $F_2$ | 133   | 33        | 75       | 100         | 58       | 51.2     |
| <i>jar1</i> $\times$ <i>jin4</i> <sup>a</sup> | $F_1$ | 33    | 23        | 33       | 10          | 0        | —        |

<sup>a</sup>Some of the  $F_1$  seeds tested derived from crosses with *jin4* as the female parent.

Inhibition of hypocotyl growth of both mutants by ethylene was similar to that seen for wild-type plants (Table III). Furthermore, addition of silver nitrate (0.1–0.02 mM), an inhibitor of ethylene action, to the root growth medium did not alter MeJA inhibition of root growth (data not shown). This indicates that the inhibition of root growth caused by MeJA is not mediated through ethylene. Germination of both mutants was inhibited by ABA. However, germination of *jin4* was more sensitive to ABA than germination of the wild type. Thus, both mutants appeared to have a normal response to exogenous ethylene and *jin4* had an increased sensitivity to exogenous ABA.

### Expression of Jasmonate-Responsive Genes

In mutants with defects in a jasmonate-regulated signal transduction pathway, the regulation of jasmonate-inducible genes might be altered. Therefore, we analyzed the expression of jasmonate-responsive genes in the mutants. It has been reported that the *A. thaliana* genes *AtVsp*, *Lox1*, and *Lox2* are induced by MeJA. *AtVsp* encodes a protein homologous to the soybean *VspA* and *VspB*. *AtVsp* mRNA levels increase in leaves and roots after seedlings are treated with MeJA (Berger et al., 1995). *Lox1* and *Lox2* encode lipoxygenases. *Lox1* is induced by MeJA and mainly expressed in roots (Melan et al., 1993), and *Lox2* is mainly expressed in leaves (Bell and Mullet, 1993). Additionally, we tested whether a gene encoding a Phe ammonia lyase, *Pall*, was induced by MeJA, because this gene is jasmonate responsive in other plant species (Gundlach et al., 1992). *Pall* was at most only slightly induced by MeJA in roots (data not shown), but induction was detectable in leaves (Fig. 1B). Therefore, the expression of *Pall* and *Lox2* was studied only in leaves, the expression of *Lox1* was studied only in roots, and *AtVsp* expression was analyzed in roots and in leaves.

As shown in the northern blot analyses in Figure 1, *AtVsp* mRNA levels were low in roots of all control plants. *AtVsp* was induced similarly by MeJA in roots of *jin1* and *jin4* in comparison to the wild type. The expression pattern of *Lox1* in roots of control and MeJA-treated plants of each wild type was unaltered in the corresponding mutant. In leaves, *Lox2* mRNA levels increased similarly in response

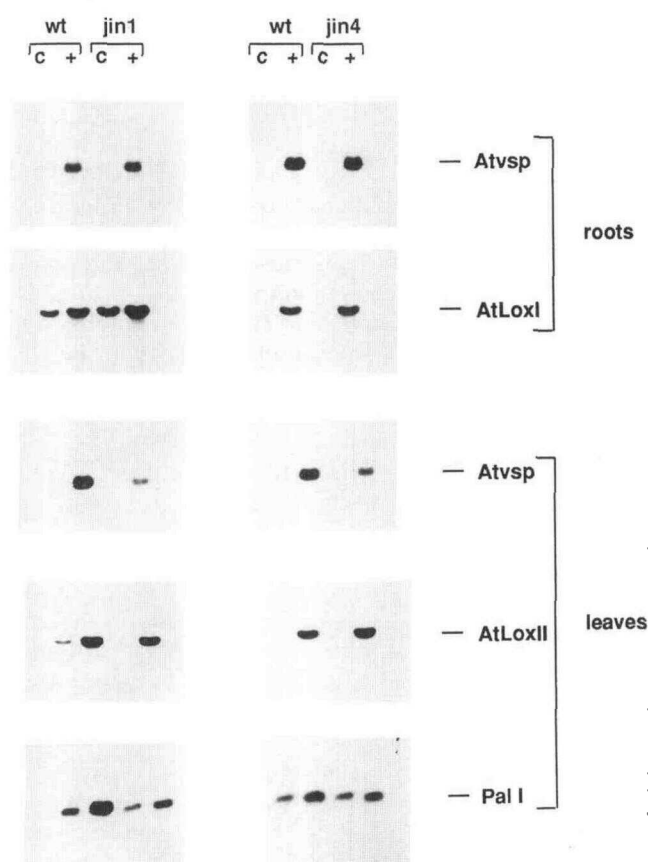

**Figure 1.** Accumulation of *AtVsp*, *Lox1*, *Lox2*, and *Pall* mRNA in leaves and roots of wild-type Columbia (wt), *jin1*, wild-type WS (wt), and *jin4* in response to MeJA. Plants were untreated (c) or treated with MeJA (final concentration 60  $\mu$ M) for 8 h (+). Seven micrograms of total nucleic acid were loaded per lane.

to MeJA treatment in the wild type and the mutant (Fig. 1). Expression of *Pall* was increased by MeJA to a similar extent in leaves of *jin1* and *jin4* in comparison to the corresponding wild type. Strong induction of *AtVsp* mRNA was detectable after addition of MeJA to wild-type seedlings. However, expression of *AtVsp* in leaves of *jin1* and *jin4* was only slightly induced by MeJA. To determine whether this weaker induction of *AtVsp* is based on a slower response to MeJA in the mutants, *AtVsp* expression was analyzed at 12, 24, and 48 h after MeJA treatment. Figure 2A shows that *AtVsp* mRNA levels did not increase further in leaves of either mutant after 12, 24, and 48 h. In this experiment, *jin4* showed almost no induction of *AtVsp* by MeJA.

To determine whether the difference in *AtVsp* expression is also detectable at the protein level, western blot analyses with an antibody directed against soybean VSP were performed. This antibody cross-reacts with two Arabidopsis proteins of 29 and 30 kD. These proteins show an expression pattern similar to that of the *AtVsp* mRNA in that they are abundant in flowers and inducible in roots and leaves by MeJA (Berger et al., 1995). In leaves of all control plants only low levels of the immunoreactive proteins could be

**Table III.** Sensitivity of *jin4* and *jin1* plants to ethylene and ABA

Hypocotyl length was measured for seedlings grown for 4 d in the dark in an atmosphere of 1  $\mu$ L/L ethylene. Results are percentages of hypocotyl length of control plants grown in air and are the average of two independent experiments. Germination on plates containing 5  $\mu$ M ABA was scored after 12 d of growth in the light. At this time, germination of all seed types on control plates without ABA was 100%. Results are the average of three independent experiments. Thirty-six seeds were measured per experiment and seed type. WtC, Wild-type Columbia, WtWS, wild-type WS.

| Value Measured                                                            | WtC         | <i>jin1</i> | WtWS       | <i>jin4</i> |
|---------------------------------------------------------------------------|-------------|-------------|------------|-------------|
| Hypocotyl growth in 1 $\mu$ L/L ethylene as a percentage of length in air | 48 $\pm$ 3  | 40 $\pm$ 1  | 44 $\pm$ 5 | 37 $\pm$ 5  |
| Percentage of germination on 5 $\mu$ M ABA                                | 80 $\pm$ 12 | 76 $\pm$ 3  | 72 $\pm$ 4 | 13 $\pm$ 5  |

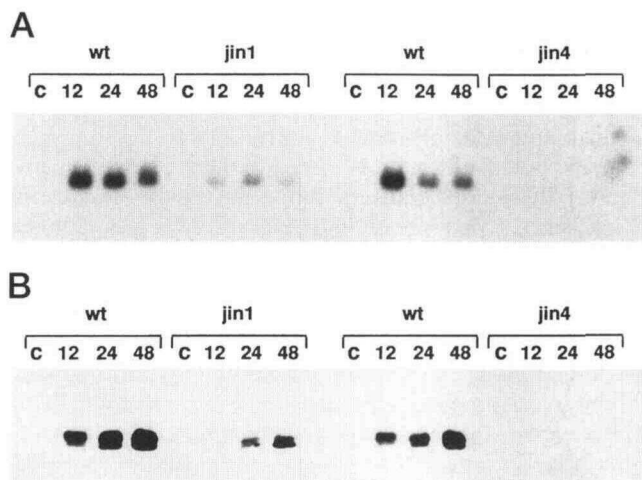

**Figure 2.** Accumulation of *AtVsp* mRNA (A) and VSP-related proteins (B) in response to MeJA in leaves of wild-type Columbia (wt), *jin1*, wild-type WS (wt), and *jin4*. Leaves of nontreated control plants (c) and of plants treated with 60  $\mu$ M MeJA were harvested at the times indicated. A, Seven micrograms of total nucleic acid were loaded per lane. B, Proteins were separated by SDS-gel electrophoresis (12  $\mu$ g of protein per lane), transferred to Immobilon P membranes, and incubated with antibody against soybean VSP.

detected (Fig. 2B). Twelve hours after addition of MeJA the 29- and 30-kD proteins increased in both wild types, and after 24 and 48 h both proteins were strongly induced. In contrast, in *jin4*, an increase of these proteins was barely detectable. In *jin1* both proteins were induced but to a smaller extent than in the wild type. It is interesting that in *jin1* the 29-kD protein was more induced than the 30-kD protein, whereas in the wild types at 12 h the 30-kD protein was more abundant and after 24 h both proteins showed the same abundance.

### Wound Response

As discussed earlier, jasmonates may be involved in wound signaling. Therefore, the wound response might be altered in MeJA-insensitive mutants. To address this question, we studied the expression of two wound-inducible genes, *Lox2* and *AtVsp*. In each mutant the expression pattern of *Lox2* in control and wounded plants was similar to that seen in the corresponding wild type (Fig. 3A). In *jin1* the pattern of *AtVsp* expression was similar to the wild type. However, a weaker induction of *AtVsp* by wounding was detected in leaves of *jin4* than in leaves of wild-type plants.

To determine whether the less substantial induction of *AtVsp* expression in *jin4* by wounding is also detectable on the protein level, protein extracts of leaves from unwounded and wounded plants were tested for abundance of VSP-related proteins. The results of the western blot analysis shown in Figure 3B indicate that the 29- and 30-kD proteins were strongly induced in leaves of wild-type plants 8 h after wounding. In *jin4* only a very small increase of both proteins could be detected after wounding. In *jin1*,

both proteins clearly accumulated in response to wounding, but the induction was less than in wild-type plants.

### Expression of *AtVsp* in Flowers

*AtVsp* is expressed in flowers at high levels (Berger et al., 1995). Since MeJA- and wound-induced *AtVsp* expression in leaves is altered in the mutants, we examined whether the constitutive expression of *AtVsp* in flowers is also changed. The northern blot in Figure 4 shows that both mutants expressed *AtVsp* in flowers at levels similar to those in wild-type plants.

### DISCUSSION

In this report we have described the characterization of two recessive, nonallelic, MeJA-insensitive mutants, *jin1* and *jin4*. Root growth in both mutants is less sensitive to MeJA than in wild type. In addition, induction of the jasmonate-responsive gene, *AtVsp*, in leaves of *jin1* and *jin4* is reduced in seedlings treated with MeJA. These same responses have been previously documented for two other *A. thaliana* mutants, *coi1* and *jar1* (Staswick et al., 1992; Feyereisen et al., 1994; Benedetti and Turner, 1995). Crosses of *jin1* and *jin4* to *coi1* demonstrated that *jin1*, *jin4*, and *coi1* affected different genes that influence plant sensitivity to jasmonate. Crosses between *jin1* and *jar1* also showed that these mutants are nonallelic. The relationship of *jin4* and *jar1* was more difficult to establish. Among all of the mutants, only *jin4* and *jar1* show increased sensitivity to ABA. A cross of *jin4* and *jar1* produced  $F_1$  plants of which 30% showed a mutant phenotype in the root growth assay. If these mutants are nonallelic, then no mutant  $F_1$  plants would be expected unless the products from one copy of

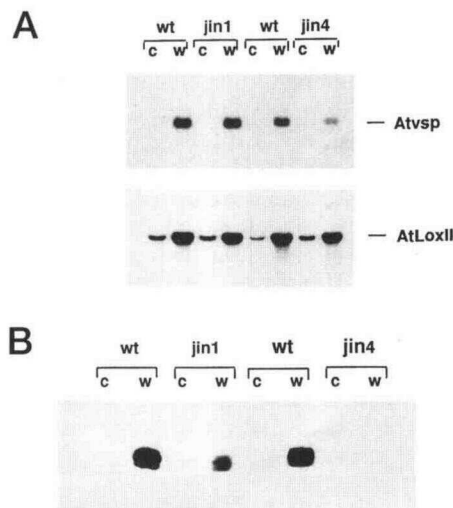

**Figure 3.** Accumulation of *AtVsp* and *Lox2* mRNA (A) and VSP-related proteins (B) in response to wounding in leaves of wild-type Columbia (wt), *jin1*, wild-type WS (wt), and *jin4*. Plants were untreated (c) or wounded (w) and leaves were harvested after 8 h of incubation in the light. A, Five micrograms of total nucleic acid were loaded per lane. B, Proteins were separated by SDS-gel electrophoresis (7  $\mu$ g of protein per lane), transferred to Immobilon P membranes, and incubated with antibody against soybean VSP.

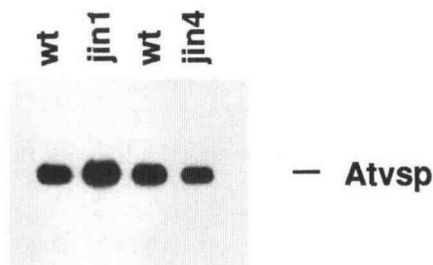

**Figure 4.** Accumulation of *AtVsp* mRNA in flowers of wild-type Columbia (wt), *jin1*, wild-type WS (wt), and *jin4*. Four micrograms of nucleic acid were loaded per lane.

the two mutated genes interact to create a mutant phenotype. If the genes altered in *jin4* and *jar1* are alleles, then all of the  $F_1$  plants should have been mutant. Furthermore, if the mutated genes in *jin4* and *jar1* are allelic, then all of the  $F_2$  plants from this cross should have been mutant. However, only 70% of the  $F_2$  progeny from the *jin4* and *jar1* cross were scored as mutant. We believe that one problem in resolving the relationship between *jin4* and *jar1* is the difficulty of scoring the jasmonate-insensitive growth in the *jar1* plants. Under our conditions, 42% of the homozygous *jar1* parental plants were scored as wild type. Further experiments including mapping of *jin4* and *jar1* will be needed to resolve this issue.

All of the jasmonate-insensitive mutants characterized to date show reduced sensitivity to root growth inhibition by MeJA. In contrast, each mutant alters subportions of the MeJA response in leaves and flowers. For example, the *coi1* mutant is male sterile and does not induce *Vsp* in flowers, whereas *jin1* and *jin4* are fertile and *Vsp* expression is normal in flowers. This suggests that the MeJA root growth inhibition assay integrates many of subprograms that are modulated by MeJA. Unfortunately, the molecular basis of jasmonate-mediated inhibition of root growth is not known. Jasmonate levels in roots are low relative to other parts of plants (Creelman et al., 1995). Similarly, jasmonate-responsive genes such as *VspA* are expressed at very low levels in roots unless plants are treated with MeJA (Mason and Mullet, 1990). Therefore, MeJA may inhibit root growth by activating genes not normally expressed in this organ. In addition, MeJA has been reported to increase ethylene biosynthesis by inducing ethylene-forming enzyme activity in tomato fruit (Czapski and Saniewski, 1992). If this occurs in roots, then increased ethylene could inhibit root growth (Goeschl and Kays, 1975). However, we did not detect ethylene accumulation in Magenta boxes or flasks containing MeJA-treated seedlings (data not shown), and the inhibitor of ethylene action, silver nitrate, did not reverse MeJA-mediated root growth inhibition. Moreover, experiments were carried out demonstrating that the mutants retain wild-type sensitivity to ethylene, as measured by a hypocotyl growth inhibition assay.

*jin1* and *jin4* show a pleiotropic phenotype that includes reduced root growth inhibition by MeJA and reduced *AtVsp* induction in leaves in response to MeJA and wounding. In both mutants, reduced induction of *AtVsp* expres-

sion was detected only in leaves; induction in roots was not altered. Furthermore, developmentally regulated expression of *AtVsp* in flowers was not changed in *jin1* or *jin4*. This argues that *jin1* and *jin4* are not mutants in *AtVsp* but instead affect factors that regulate *AtVsp* expression in response to MeJA and wounding in leaves. The affected part of the signal transduction pathway is specific for *AtVsp*, since expression of *Pall*, *Lox1*, and *Lox2* is not altered in the mutants. MeJA-induced accumulation of *Vsp* mRNA in soybean is inhibited if plants are pretreated with cycloheximide to block cytoplasmic translation (D. DeWald and J.E. Mullet, unpublished data). Similarly, MeJA-induced accumulation of *Pin2* is also blocked by pretreatment with inhibitors of proteins synthesis (Pena-Cortes et al., 1995). This suggests that MeJA initially activates transcription of a gene that is required to activate transcription of the *Vsp* and perhaps other genes. The genes identified by *jin1* and *jin4* could act to modulate the lower part of this cascade, which is consistent with their somewhat selective influence on *AtVsp* expression in leaves.

The phenotypes of *jin1* and *jin4* make it unlikely that these mutants identify jasmonate receptors. In contrast, the jasmonate-insensitive mutant *coi1* exhibits jasmonate-insensitive root growth, loss of MeJA-induced *AtVsp* expression in leaves and flowers, and loss of MeJA-induced expression of *Lox* in leaves (Benedetti and Turner, 1995). These characteristics are consistent with *coi1* being upstream of *jin1* and *jin4* in the MeJA signal transduction pathway, assuming that all three genes are on the same pathway, and suggest that *coi1* may alter an MeJA receptor.

In potato and tomato, ABA has been shown to potentiate jasmonate biosynthesis in response to wounding (Pena-Cortes, et al., 1995). It is interesting that *jin4* and *jar1* plants (Staswick et al., 1992) exhibit increased sensitivity to ABA in germination assays. Therefore, although ABA potentiates jasmonate biosynthesis, jasmonate in wild-type plants may diminish the ability of ABA to repress germination. These mutants identify one component in the jasmonate signal transduction pathway that interacts with or influences the ABA signal transduction pathway.

#### ACKNOWLEDGMENTS

We thank R.M. Haisler for excellent technical assistance. We thank P.E. Staswick and J.G. Turner for providing the mutants *jar1* and *coi1*. We thank K. Davis for providing the *Pall* clone and C.E. Benedetti for communicating results prior to publication.

Received November 8, 1995; accepted February 19, 1996.  
Copyright Clearance Center: 0032-0889/96/111/0525/07.

#### LITERATURE CITED

- Bell E, Mullet JE (1993) Characterization of an *Arabidopsis* lipoxigenase gene responsive to methyl jasmonate and wounding. *Plant Physiol* 103: 1133–1138
- Benedetti CE, Turner JG (1995) *COI1*-dependent expression of an *Arabidopsis* vegetative storage protein in flowers and siliques and in response to coronatine or methyl jasmonate. *Plant Physiol* 109: 567–572
- Berger S, Bell E, Sadka A, Mullet JE (1995) *Arabidopsis thaliana AtVsp* is homologous to soybean *VspA* and *VspB*, genes encod-

- ing vegetative storage protein acid phosphatases, and is regulated similarly by methyl jasmonate, wounding, sugars, light and phosphate. *Plant Mol Biol* 27: 933–942
- Chaudhry B, Muller-Uri F, Cameron-Mills V, Gough S, Simpson D, Skriver K, Mundy J** (1994) The barley 60 kDa jasmonate induced protein (JIP60) is a novel ribosome inactivating protein. *Plant J* 6: 815–824
- Creelman RA, Mullet JE** (1995) Jasmonic acid distribution and action in plants: regulation during development and response to biotic and abiotic stress. *Proc Natl Acad Sci USA* 92: 4114–4119
- Creelman RA, Tierney ML, Mullet JE** (1992) Jasmonic acid/methyl jasmonate accumulate in wounded soybean hypocotyls and modulate wound gene expression. *Proc Natl Acad Sci USA* 89: 4938–4941
- Czapski J, Saniewski M** (1992) Stimulation of ethylene production and ethylene-forming enzyme activity in fruits of the non-ripening nor and rin tomato mutants by methyl jasmonate. *J Plant Physiol* 139: 265–268
- DeWald D, Mason HS, Mullet JE** (1992) The soybean vegetative storage proteins *VspA* and *VspB* are acid phosphatases active on polyphosphates. *J Biol Chem* 267: 15958–15964
- Falkenstein E, Groth B, Mithoefer A, Weiler EW** (1991) Methyl jasmonate and linolenic acid are potent inducers of tendril coiling. *Planta* 185: 316–322
- Farmer EE, Johnson RR, Ryan CA** (1992) Regulation of expression of proteinase inhibitor genes by methyl jasmonate and jasmonic acid. *Plant Physiol* 98: 995–1002
- Farmer EE, Ryan CA** (1992) Octadecanoid precursors of jasmonic acid activate the synthesis of wound inducible proteinase inhibitors. *Plant Cell* 4: 129–134
- Feys BJF, Benedetti CE, Penfold CN, Turner JG** (1994) *Arabidopsis* mutants selected for resistance to the phytotoxin coronatine are male sterile, insensitive to methyl jasmonate, and resistant to a bacterial pathogen. *Plant Cell* 6: 751–759
- Goeschl JD, Kays SJ** (1975) Concentration dependencies of some effects of ethylene on etiolated pea, peanut, bean, and cotton seedlings. *Plant Physiol* 55: 670–677
- Gundlach H, Muller MJ, Kutschan TM, Zenk MH** (1992) Jasmonic acid is a signal transducer in elicitor-induced plant cell cultures. *Proc Natl Acad Sci USA* 89: 2389–2393
- Herrmann G, Lehmann J, Peterson A, Sembdner G, Weidhase RA, Parthier B** (1989) Species and tissue specificity of jasmonate-induced abundant proteins. *J Plant Physiol* 134: 703–709
- Kim S-R, Choi J-L, Costa MA, An G** (1992) Identification of G-box sequence as an essential element for methyl jasmonate response of potato proteinase inhibitor II promoter. *Plant Physiol* 99: 627–631
- Klee H, Estelle M** (1991) Molecular genetic approaches to plant hormone biology. *Annu Rev Plant Physiol Plant Mol Biol* 42: 529–551
- Koda Y** (1992) The role of jasmonic acid and related compounds in the regulation of plant development. *Int Rev Cytol* 135: 155–199
- Mason HS, DeWald DB, Mullet JE** (1993) Identification of a methyl jasmonate-responsive domain in the soybean *VspB* promoter. *Plant Cell* 5: 241–251
- Mason HS, Mullet JE** (1990) Expression of two soybean vegetative storage protein genes during development and in response to water deficit, wounding and jasmonic acid. *Plant Cell* 2: 569–579
- Melan MA, Dong X, Endara ME, Davis KR, Ausubel FM, Peterman TK** (1993) An *Arabidopsis thaliana* lipoxygenase gene is induced by pathogens, abscisic acid, and methyl jasmonate. *Plant Physiol* 101: 441–450
- Murashige T, Skoog F** (1962) A revised medium for rapid growth and bioassays with tobacco tissue cultures. *Physiol Plant* 15: 493–497
- Pena-Cortes H, Fisahn J, Willmitzer L** (1995) Signals involved in wound-induced proteinase inhibitor II gene expression in tomato and potato plants. *Proc Natl Acad Sci USA* 92: 4106–4113
- Reinbothe S, Mollenhauer B, Reinbothe C** (1994) JIPs and RIPs: the regulation of plant gene expression by jasmonates in response to environmental cues and pathogens. *Plant Cell* 6: 1197–1209
- Reinbothe S, Reinbothe C, Parthier B** (1993) Methyl jasmonate-regulated translation of nuclear-encoded chloroplast proteins in barley. *J Biol Chem* 268: 10606–10611
- Schulze-Lefert P, Dangl JL, Becker-Andre M, Hahlbrook K, Schulz W** (1989) Inducible in vivo DNA footprints define sequences necessary for UV light activation of the parsley chalcone synthase clone. *EMBO J* 8: 651–656
- Staswick PE, Su W, Howell SH** (1992) Methyl jasmonate inhibition of root growth and induction of a leaf protein are decreased in an *Arabidopsis thaliana* mutant. *Proc Natl Acad Sci USA* 89: 6837–6840
- Tranbarger TJ, Franceschi VR, Hildebrand DF, Grimes HD** (1991) The soybean 94-kilodalton vegetative storage protein is a lipoxygenase that is localized in paraveinal mesophyll cell vacuoles. *Plant Cell* 3: 973–987
- Vick BA, Zimmerman DC** (1984) Biosynthesis of jasmonic acid by several plant species. *Plant Physiol* 75: 458–461
- Wanner LA, Li G, Ware D, Somssich IE, Davis KR** (1995) The phenylalanine ammonia-lyase gene family in *Arabidopsis thaliana*. *Plant Mol Biol* 27: 327–338
- Weidhase RA, Lehmann J, Kramell H, Sembdner G, Parthier B** (1987) Degradation of ribulose-1,5-bisphosphate carboxylase and chlorophyll in senescing barley leaf segments triggered by jasmonic acid methyl ester, and counteraction by cytokinin. *Physiol Plant* 69: 161–166
- Wittenbach VA** (1982) Effect of pod removal on leaf senescence in soybeans. *Plant Physiol* 70: 1544–1548
- Wittenbach VA** (1983) Effect of pod removal on leaf photosynthesis and soluble protein composition of field-grown soybeans. *Plant Physiol* 73: 121–124
- Xu Y, Chang L, Liu D, Narasimhan ML, Raghothama KG, Hasegawa PM, Bressan RA** (1994) Plant defense genes are synergistically induced by ethylene and methyl jasmonate. *Plant Cell* 6: 1077–1085
- Yamane H, Takagi H, Abe H, Yokota T, Takahashi N** (1981) Identification of jasmonic acid in three species of higher plants and its biological activities. *Plant Cell Physiol* 22: 689–697
